# Supplementary material for: RETRACTED: A Novel Inhibitor of Carbonic Anhydrases Prevents Hypoxia-Induced TNBC Cell Plasticity
Source: MDPI journal article supplement (doi:10.3390/ijms21218405), 2020-11-09
Supplement: s1 [file s1]

# Supplementary Figures:

## A Novel Inhibitor of Carbonic Anhydrases Prevents Hypoxia-Induced TNBC Cell Plasticity

Annachiara Sarnella, Giuliana D'Avino, Billy Samuel Hill, Vincenzo Alterio, Jean-Yves Winum, Claudiu T Supuran, Giuseppina De Simone, Antonella Zannetti.

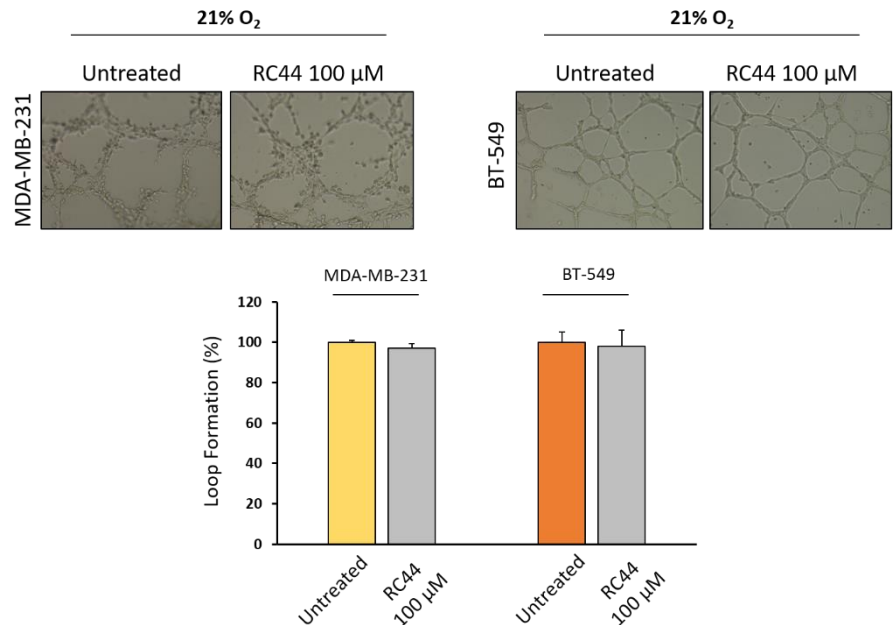

**Figure S1. Effect of RC44 on TNBC vasculogenic mimicry in Normoxia.** MDA-MB-231 and BT-549 were grown in normoxia (21% O<sub>2</sub>) conditions and vascular loops were analyzed. TNBC cells were treated with RC44 (100 μM) and seeded into 24-well plates pre-coated with 80 μl/well Matrigel. Representative images were taken at 10× and average of the number of complete loops was calculated from 3–5 random fields by a macro made with ImageJ software. Bars depict mean ±SD of three independent experiments.

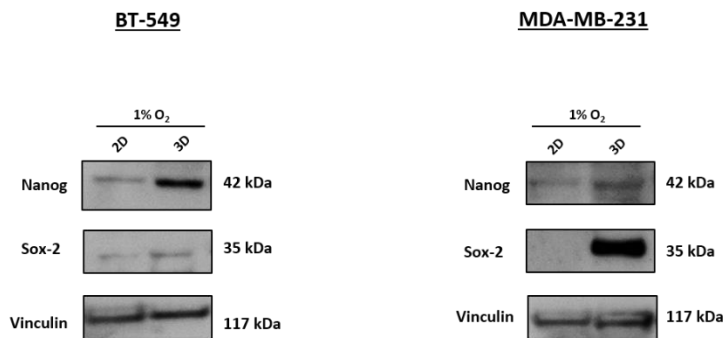

**Figure S2.** TNBC cells were grown in 2D and 3D under hypoxia (1% O<sub>2</sub>). Nanog and Sox-2 protein levels were analyzed by western blot analysis. Vinculin was used as loading control.

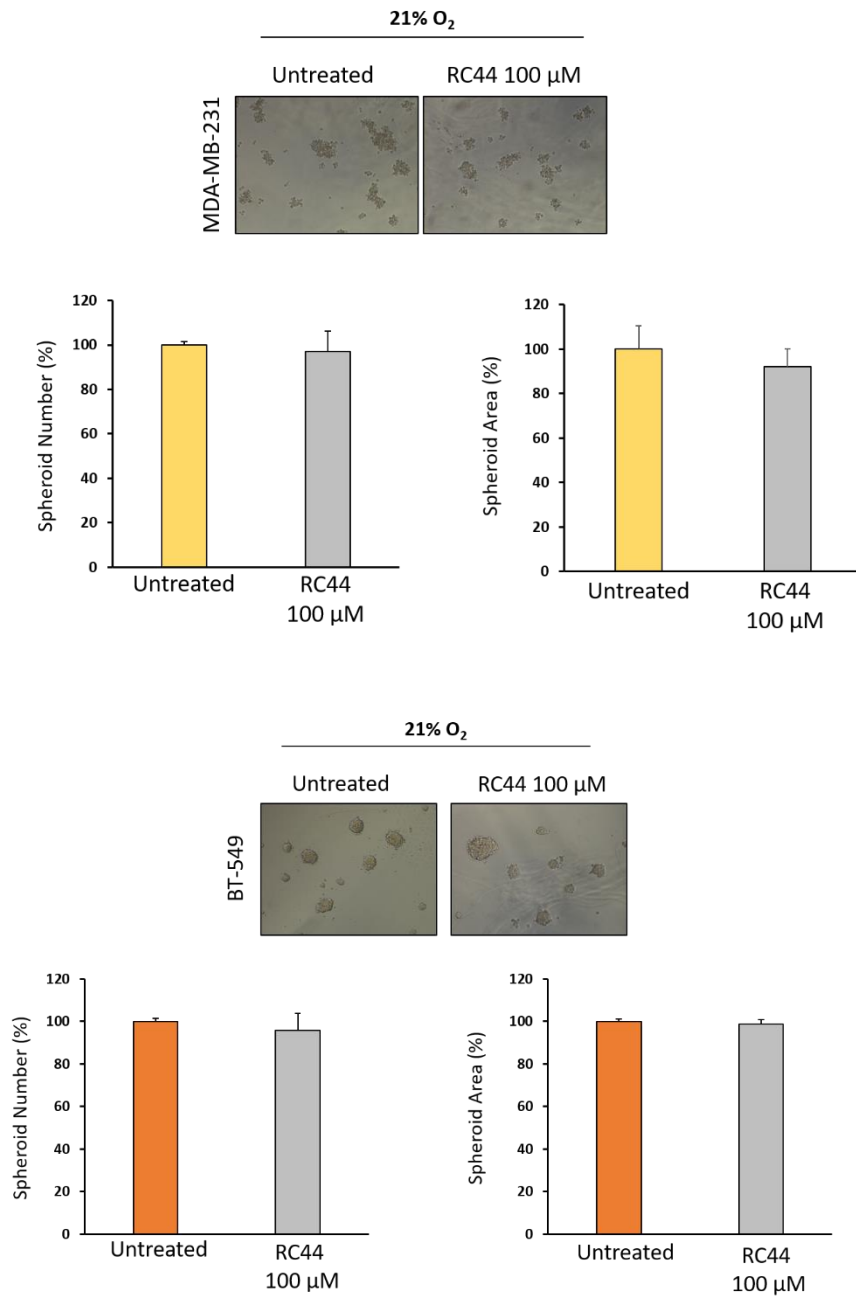

**Figure S3.** Effect of RC44 on TNBC spheroid formation in Normoxia (21% O<sub>2</sub>). BT-549 and MDA-MB-231 cells were seeded in Ultra-Low attachment multiwell-plates and grown in serum free DMEM supplemented with B27, bFGF (20 ng/mL) and EGF (10 ng/mL) in normoxic conditions for 7 days. TNBC cells were treated with RC44 (100  $\mu$ M) and grown as described above. Spheroid formation was analyzed under a phase-contrast microscopy and size and number of formed spheroids was calculated using ImageJ. Bars depict mean  $\pm$ SD of three independent experiments.
